# Supplementary material
Source: Springer Nature journal article supplement (https://www.springermedizin.de/resource/supplementary/12991_2003_176_MOESM1_ESM.pdf/9538084)
Supplement: MOESM1 [file 9538084]

Figure 1: *STRS* Full version (2 minutes)

|                                                                                                                                                                                                                                                                                                                                                                                                                                                                                                        |                                                                                                                                                                                                                                                                                                                      |            |           |                   |           |                   |  |  |     |  |  |  |             |  |  |  |                                                                |
|--------------------------------------------------------------------------------------------------------------------------------------------------------------------------------------------------------------------------------------------------------------------------------------------------------------------------------------------------------------------------------------------------------------------------------------------------------------------------------------------------------|----------------------------------------------------------------------------------------------------------------------------------------------------------------------------------------------------------------------------------------------------------------------------------------------------------------------|------------|-----------|-------------------|-----------|-------------------|--|--|-----|--|--|--|-------------|--|--|--|----------------------------------------------------------------|
| <p>STRS: (Bracha, Williams, Haynes, Kubany et al. 2004) A distress checklist with panic-like sympathetic indicators; designed to facilitate the augmentation of the positive predictive validity of PTSD criterion A2 in post-disaster screening and acute stress response research.</p>                                                                                                                                                                                                               | <h1 style="margin: 0;"><i>STRS</i></h1> <h2 style="margin: 0;">A Symptom Checklist for Acute Distress<br/>(Shortness, Trembling, Racing, Sweating)</h2> <p style="margin: 0;">Full version (2 minutes)</p>                                                                                                           |            |           |                   |           |                   |  |  |     |  |  |  |             |  |  |  |                                                                |
| <p><b>Interviewer:</b> Complete one page for each self-reported incident.<br/> <b>Record age at which incident was experienced. Read aloud only shaded - capitalized texts.</b></p>                                                                                                                                                                                                                                                                                                                    |                                                                                                                                                                                                                                                                                                                      |            |           |                   |           |                   |  |  |     |  |  |  |             |  |  |  |                                                                |
| <p>YOU HAVE SAID _____ HAS HAPPENED TO YOU # ____ TIMES.<br/>         I WANT TO ASK YOU SOME QUESTIONS ABOUT YOUR REACTIONS TO THE<br/>         (Circle) 1st 2nd 3rd 4<sup>th</sup> TIME.</p>                                                                                                                                                                                                                                                                                                          |                                                                                                                                                                                                                                                                                                                      |            |           |                   |           |                   |  |  |     |  |  |  |             |  |  |  |                                                                |
| <p><b>Interviewer: Record age at the time of circled incident here ____ years</b></p>                                                                                                                                                                                                                                                                                                                                                                                                                  |                                                                                                                                                                                                                                                                                                                      |            |           |                   |           |                   |  |  |     |  |  |  |             |  |  |  |                                                                |
| <p>PLEASE INDICATE WHETHER YOU HAD ANY OF THESE FEELINGS, OR THOUGHTS, DURING THE TIME (name incident) WAS GOING ON, THAT IS, WHILE IT WAS HAPPENING. DID YOU FEEL ANY OF THESE:<br/>         NOT AT ALL, SLIGHTLY, SOMEWHAT, VERY MUCH, OR AN EXTREME AMOUNT ?</p>                                                                                                                                                                                                                                    |                                                                                                                                                                                                                                                                                                                      |            |           |                   |           |                   |  |  |     |  |  |  |             |  |  |  |                                                                |
| <b>DID YOU FEEL...</b>                                                                                                                                                                                                                                                                                                                                                                                                                                                                                 | <table border="1" style="width: 100%; text-align: center; border-collapse: collapse;"> <tr> <td style="width: 15%;">NOT AT ALL</td> <td style="width: 15%;">SLIGHTLY</td> <td style="width: 15%;">SOMEWHAT</td> <td style="width: 15%;">VERY MUCH</td> <td style="width: 15%;">AN EXTREME AMOUNT</td> </tr> </table> | NOT AT ALL | SLIGHTLY  | SOMEWHAT          | VERY MUCH | AN EXTREME AMOUNT |  |  |     |  |  |  |             |  |  |  |                                                                |
| NOT AT ALL                                                                                                                                                                                                                                                                                                                                                                                                                                                                                             | SLIGHTLY                                                                                                                                                                                                                                                                                                             | SOMEWHAT   | VERY MUCH | AN EXTREME AMOUNT |           |                   |  |  |     |  |  |  |             |  |  |  |                                                                |
| THAT YOU OR A SIGNIFICANT OTHER WOULD BE SERIOUSLY PHYSICALLY INJURED / KILLED ?                                                                                                                                                                                                                                                                                                                                                                                                                       | <table border="1" style="width: 100%; text-align: center; border-collapse: collapse;"> <tr> <td style="width: 15%;">0</td> <td style="width: 15%;">1</td> <td style="width: 15%;">2</td> <td style="width: 15%;">3</td> <td style="width: 15%;">4</td> </tr> </table>                                                | 0          | 1         | 2                 | 3         | 4                 |  |  |     |  |  |  |             |  |  |  |                                                                |
| 0                                                                                                                                                                                                                                                                                                                                                                                                                                                                                                      | 1                                                                                                                                                                                                                                                                                                                    | 2          | 3         | 4                 |           |                   |  |  |     |  |  |  |             |  |  |  |                                                                |
| <p>DSM-IV-TR PTSD Criterion <b>A1</b> total →</p>                                                                                                                                                                                                                                                                                                                                                                                                                                                      |                                                                                                                                                                                                                                                                                                                      |            |           |                   |           |                   |  |  |     |  |  |  |             |  |  |  |                                                                |
| <p style="text-align: right;">/4</p>                                                                                                                                                                                                                                                                                                                                                                                                                                                                   |                                                                                                                                                                                                                                                                                                                      |            |           |                   |           |                   |  |  |     |  |  |  |             |  |  |  |                                                                |
| INTENSELY FEARFUL? SCARED ?                                                                                                                                                                                                                                                                                                                                                                                                                                                                            | <table border="1" style="width: 100%; text-align: center; border-collapse: collapse;"> <tr> <td style="width: 15%;">0</td> <td style="width: 15%;">1</td> <td style="width: 15%;">2</td> <td style="width: 15%;">3</td> <td style="width: 15%;">4</td> </tr> </table>                                                | 0          | 1         | 2                 | 3         | 4                 |  |  |     |  |  |  |             |  |  |  |                                                                |
| 0                                                                                                                                                                                                                                                                                                                                                                                                                                                                                                      | 1                                                                                                                                                                                                                                                                                                                    | 2          | 3         | 4                 |           |                   |  |  |     |  |  |  |             |  |  |  |                                                                |
| HELPLESS ?                                                                                                                                                                                                                                                                                                                                                                                                                                                                                             | <table border="1" style="width: 100%; text-align: center; border-collapse: collapse;"> <tr> <td style="width: 15%;">0</td> <td style="width: 15%;">1</td> <td style="width: 15%;">2</td> <td style="width: 15%;">3</td> <td style="width: 15%;">4</td> </tr> </table>                                                | 0          | 1         | 2                 | 3         | 4                 |  |  |     |  |  |  |             |  |  |  |                                                                |
| 0                                                                                                                                                                                                                                                                                                                                                                                                                                                                                                      | 1                                                                                                                                                                                                                                                                                                                    | 2          | 3         | 4                 |           |                   |  |  |     |  |  |  |             |  |  |  |                                                                |
| HORROR ? *                                                                                                                                                                                                                                                                                                                                                                                                                                                                                             | <table border="1" style="width: 100%; text-align: center; border-collapse: collapse;"> <tr> <td style="width: 15%;">0</td> <td style="width: 15%;">1</td> <td style="width: 15%;">2</td> <td style="width: 15%;">3</td> <td style="width: 15%;">4</td> </tr> </table>                                                | 0          | 1         | 2                 | 3         | 4                 |  |  |     |  |  |  |             |  |  |  |                                                                |
| 0                                                                                                                                                                                                                                                                                                                                                                                                                                                                                                      | 1                                                                                                                                                                                                                                                                                                                    | 2          | 3         | 4                 |           |                   |  |  |     |  |  |  |             |  |  |  |                                                                |
| <p>DSM-IV-TR PTSD Criterion <b>A2</b> total →</p>                                                                                                                                                                                                                                                                                                                                                                                                                                                      |                                                                                                                                                                                                                                                                                                                      |            |           |                   |           |                   |  |  |     |  |  |  |             |  |  |  |                                                                |
| <p style="text-align: right;">/12</p>                                                                                                                                                                                                                                                                                                                                                                                                                                                                  |                                                                                                                                                                                                                                                                                                                      |            |           |                   |           |                   |  |  |     |  |  |  |             |  |  |  |                                                                |
| <b>DID YOU EXPERIENCE...</b>                                                                                                                                                                                                                                                                                                                                                                                                                                                                           | <table border="1" style="width: 100%; text-align: center; border-collapse: collapse;"> <tr> <td style="width: 15%;">NOT AT ALL</td> <td style="width: 15%;">SLIGHTLY</td> <td style="width: 15%;">SOMEWHAT</td> <td style="width: 15%;">VERY MUCH</td> <td style="width: 15%;">AN EXTREME AMOUNT</td> </tr> </table> | NOT AT ALL | SLIGHTLY  | SOMEWHAT          | VERY MUCH | AN EXTREME AMOUNT |  |  |     |  |  |  |             |  |  |  |                                                                |
| NOT AT ALL                                                                                                                                                                                                                                                                                                                                                                                                                                                                                             | SLIGHTLY                                                                                                                                                                                                                                                                                                             | SOMEWHAT   | VERY MUCH | AN EXTREME AMOUNT |           |                   |  |  |     |  |  |  |             |  |  |  |                                                                |
| <b>SHORTNESS OF BREATH ?</b>                                                                                                                                                                                                                                                                                                                                                                                                                                                                           | <table border="1" style="width: 100%; text-align: center; border-collapse: collapse;"> <tr> <td style="width: 15%;">0</td> <td style="width: 15%;">1</td> <td style="width: 15%;">2</td> <td style="width: 15%;">3</td> <td style="width: 15%;">4</td> </tr> </table>                                                | 0          | 1         | 2                 | 3         | 4                 |  |  |     |  |  |  |             |  |  |  |                                                                |
| 0                                                                                                                                                                                                                                                                                                                                                                                                                                                                                                      | 1                                                                                                                                                                                                                                                                                                                    | 2          | 3         | 4                 |           |                   |  |  |     |  |  |  |             |  |  |  |                                                                |
| <b>TREMBLING, SHAKING, OR BUCKLING KNEES ?</b>                                                                                                                                                                                                                                                                                                                                                                                                                                                         | <table border="1" style="width: 100%; text-align: center; border-collapse: collapse;"> <tr> <td style="width: 15%;">0</td> <td style="width: 15%;">1</td> <td style="width: 15%;">2</td> <td style="width: 15%;">3</td> <td style="width: 15%;">4</td> </tr> </table>                                                | 0          | 1         | 2                 | 3         | 4                 |  |  |     |  |  |  |             |  |  |  |                                                                |
| 0                                                                                                                                                                                                                                                                                                                                                                                                                                                                                                      | 1                                                                                                                                                                                                                                                                                                                    | 2          | 3         | 4                 |           |                   |  |  |     |  |  |  |             |  |  |  |                                                                |
| <b>HEART POUNDING OR RACING ?</b>                                                                                                                                                                                                                                                                                                                                                                                                                                                                      | <table border="1" style="width: 100%; text-align: center; border-collapse: collapse;"> <tr> <td style="width: 15%;">0</td> <td style="width: 15%;">1</td> <td style="width: 15%;">2</td> <td style="width: 15%;">3</td> <td style="width: 15%;">4</td> </tr> </table>                                                | 0          | 1         | 2                 | 3         | 4                 |  |  |     |  |  |  |             |  |  |  |                                                                |
| 0                                                                                                                                                                                                                                                                                                                                                                                                                                                                                                      | 1                                                                                                                                                                                                                                                                                                                    | 2          | 3         | 4                 |           |                   |  |  |     |  |  |  |             |  |  |  |                                                                |
| <b>SWEATY PALMS ?</b> ____<br>OTHER SWEATING ? ____                                                                                                                                                                                                                                                                                                                                                                                                                                                    | <table border="1" style="width: 100%; text-align: center; border-collapse: collapse;"> <tr> <td style="width: 15%;">0</td> <td style="width: 15%;">1</td> <td style="width: 15%;">2</td> <td style="width: 15%;">3</td> <td style="width: 15%;">4</td> </tr> </table>                                                | 0          | 1         | 2                 | 3         | 4                 |  |  |     |  |  |  |             |  |  |  |                                                                |
| 0                                                                                                                                                                                                                                                                                                                                                                                                                                                                                                      | 1                                                                                                                                                                                                                                                                                                                    | 2          | 3         | 4                 |           |                   |  |  |     |  |  |  |             |  |  |  |                                                                |
| <p><b><i>STRS</i></b> Peritraumatic Sympathetic Activation Indicators total →</p>                                                                                                                                                                                                                                                                                                                                                                                                                      |                                                                                                                                                                                                                                                                                                                      |            |           |                   |           |                   |  |  |     |  |  |  |             |  |  |  |                                                                |
| <p style="text-align: right;">/16</p>                                                                                                                                                                                                                                                                                                                                                                                                                                                                  |                                                                                                                                                                                                                                                                                                                      |            |           |                   |           |                   |  |  |     |  |  |  |             |  |  |  |                                                                |
| <table border="1" style="width: 100%; border-collapse: collapse;"> <tr> <td style="width: 15%;"></td> <td style="width: 15%; text-align: center;">Y Y Y Y</td> <td style="width: 15%; text-align: center;">M M</td> <td style="width: 15%; text-align: center;">D D</td> </tr> <tr> <td>Date</td> <td style="text-align: center;">20 _____</td> <td></td> <td></td> </tr> <tr> <td>DOB</td> <td></td> <td></td> <td></td> </tr> <tr> <td>Derived Age</td> <td></td> <td></td> <td></td> </tr> </table> |                                                                                                                                                                                                                                                                                                                      | Y Y Y Y    | M M       | D D               | Date      | 20 _____          |  |  | DOB |  |  |  | Derived Age |  |  |  | Code / ID OR Other information about the distressing incident: |
|                                                                                                                                                                                                                                                                                                                                                                                                                                                                                                        | Y Y Y Y                                                                                                                                                                                                                                                                                                              | M M        | D D       |                   |           |                   |  |  |     |  |  |  |             |  |  |  |                                                                |
| Date                                                                                                                                                                                                                                                                                                                                                                                                                                                                                                   | 20 _____                                                                                                                                                                                                                                                                                                             |            |           |                   |           |                   |  |  |     |  |  |  |             |  |  |  |                                                                |
| DOB                                                                                                                                                                                                                                                                                                                                                                                                                                                                                                    |                                                                                                                                                                                                                                                                                                                      |            |           |                   |           |                   |  |  |     |  |  |  |             |  |  |  |                                                                |
| Derived Age                                                                                                                                                                                                                                                                                                                                                                                                                                                                                            |                                                                                                                                                                                                                                                                                                                      |            |           |                   |           |                   |  |  |     |  |  |  |             |  |  |  |                                                                |
| <p>* Horror was not part of the original validated STRS (see text) but is now recommended based on subsequent research.</p>                                                                                                                                                                                                                                                                                                                                                                            |                                                                                                                                                                                                                                                                                                                      |            |           |                   |           |                   |  |  |     |  |  |  |             |  |  |  |                                                                |
| <p><b><i>STRS</i></b> total →</p>                                                                                                                                                                                                                                                                                                                                                                                                                                                                      |                                                                                                                                                                                                                                                                                                                      |            |           |                   |           |                   |  |  |     |  |  |  |             |  |  |  |                                                                |
| <p style="text-align: right;">/32</p>                                                                                                                                                                                                                                                                                                                                                                                                                                                                  |                                                                                                                                                                                                                                                                                                                      |            |           |                   |           |                   |  |  |     |  |  |  |             |  |  |  |                                                                |
